# Supplementary material
Source: publisher site journal article supplement (https://www.spandidos-publications.com/1504/downloadSupplementary)

Figure S1. Knockdown of miR-1307-3p inhibits cell proliferation. (A) miR-1307-3p expression levels and (B) cell proliferation in NCM460 cells transfected with miR-1307-3p inhibitor or miR-con. \*\*\* $P < 0.01$  vs. miR-con. miR-1307-3p: microRNA-1307-3p; miR-con: Negative control miRNA; OD, optical density.

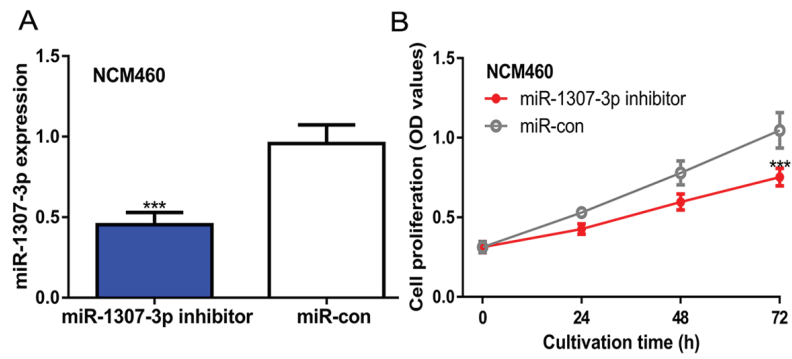

Supplement: Supplementary file 1 [file downloadSupplementary]
